# Supplementary material for: AQUIVION® perfluorosulfonic acid resin for butyl levulinate production from furfuryl alcohol
Source: Royal Society of Chemistry journal article supplement (doi:10.1039/c9nj03747k), 2019-01-01
Supplement: c9nj03747k1.pdf [file c9nj03747k1.pdf]

## AQUIVION® Perfluorosulfonic acid resin for butyl levulinate production from furfuryl alcohol

Hilda Gómez Bernal,<sup>a</sup> Claudio Oldani,<sup>b</sup> Tiziana Funaioli,<sup>a</sup> and Anna Maria Raspolli-Galletti<sup>a</sup>

<sup>a</sup>Dipartimento di Chimica e Chimica Industriale, Università di Pisa. Via Giuseppe Moruzzi, 13, 56124 Pisa, Italy

<sup>b</sup>Solvay Specialty Polymers, Viale Lombardia 20, 20021 Bollate MI, Italy.

Supplementary material for New Journal of Chemistry

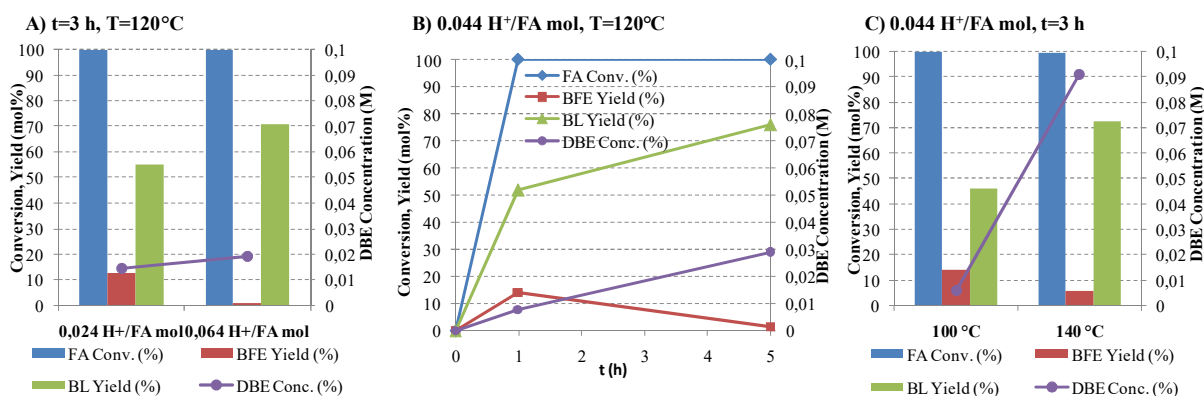

**Figure S1.** Main effects of each variable on FA alcoholysis. Varying A) catalyst to substrate ratio, B) time and C) temperature.

Table S1. Significance of regression coefficients for BL yield

| Source   | Sum of squares | degrees of freedom | Mean squares | F value | p value  |
|----------|----------------|--------------------|--------------|---------|----------|
| $x_1$    | 1159,331       | 1                  | 1159,3       | 44,242  | 0,00029  |
| $x_2$    | 1272,131       | 1                  | 1272,1       | 48,55   | 0,000253 |
| $x_3$    | 1307,501       | 1                  | 1307,5       | 49,90   | 0,00022  |
| $x_1x_2$ | 29,47874       | 1                  | 29,479       | 1,12    | 0,32507  |
| $x_1x_3$ | 85,60512       | 1                  | 85,605       | 3,27    | 0,1135   |
| $x_2x_3$ | 151,2874       | 1                  | 151,29       | 5,7734  | 0,04727  |
| $x_1^2$  | 92,24772       | 1                  | 92,248       | 3,5203  | 0,10273  |
| $x_2^2$  | 63,91167       | 1                  | 63,912       | 2,439   | 0,16232  |
| $x_3^2$  | 241,1365       | 1                  | 241,14       | 9,2021  | 0,01902  |

Table S2. ANOVA for BL yield

| Source       | Sum of squares | degrees of freedom | Mean squares | F value | p value |
|--------------|----------------|--------------------|--------------|---------|---------|
| Total        | 5352,74        | 17                 |              |         |         |
| Model        | 5169,31        | 9                  | 574,37       | 21,92   | .000253 |
| Residuals    | 183,43         | 7                  | 26,20        |         |         |
| Lack of fit  | 176,39         | 5                  | 35,28        | 10,01   | .093285 |
| Pure error   | 7,05           | 2                  | 3,52         |         |         |
| $R^2=$       | 0,97           |                    |              |         |         |
| $R^2_{adj}=$ | 0,92           |                    |              |         |         |

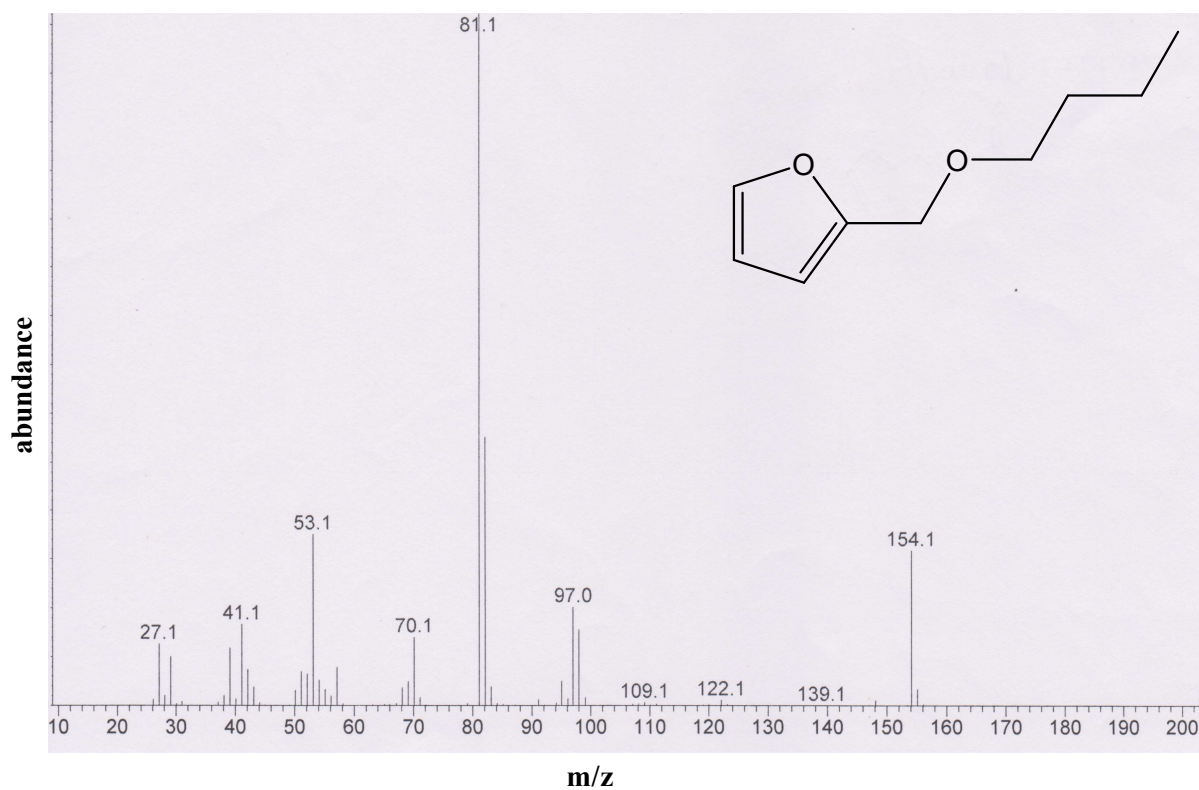

**Figure S2.** Mass spectra of butoxy methyl furan ether (BFE) intermediate detected by GC-MS during FA butanolysis in presence of Aquivion P87S.

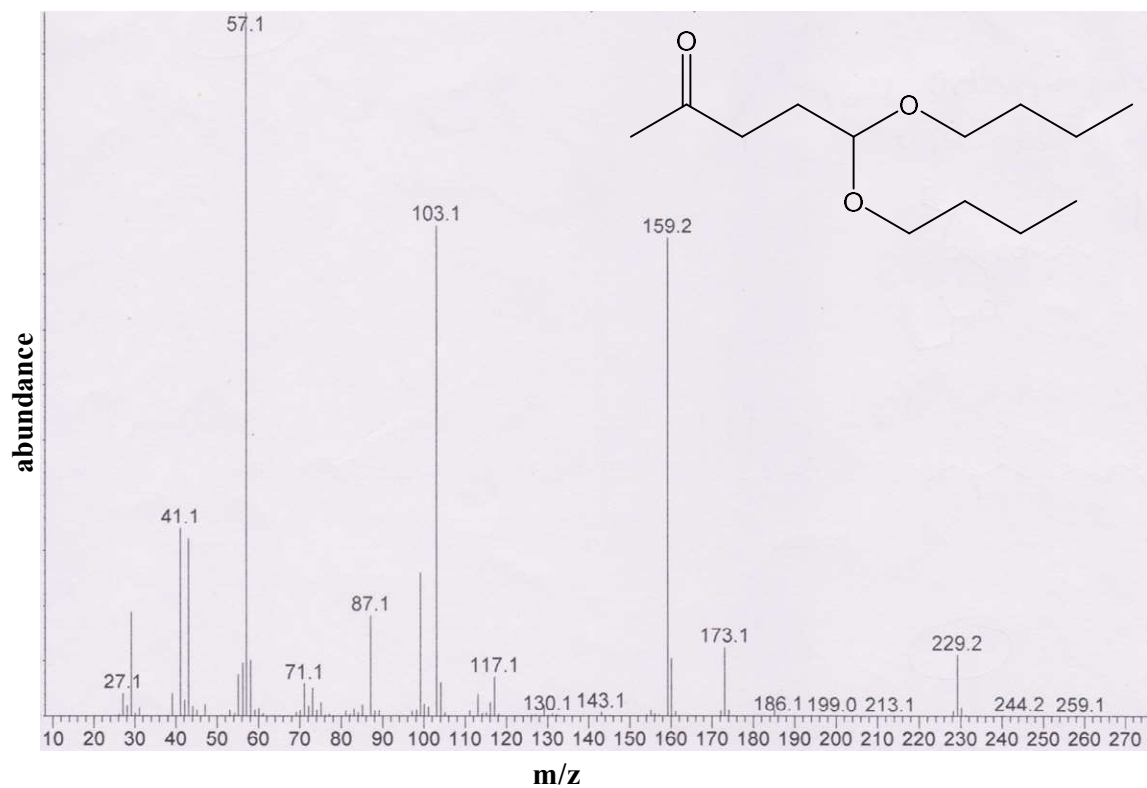

**Figure S3.** Mass spectra of 5-5-dibutoxy-2-pentanone (DBP) intermediate detected by GC-MS during FA butanolysis in presence of Aquivion P87S.

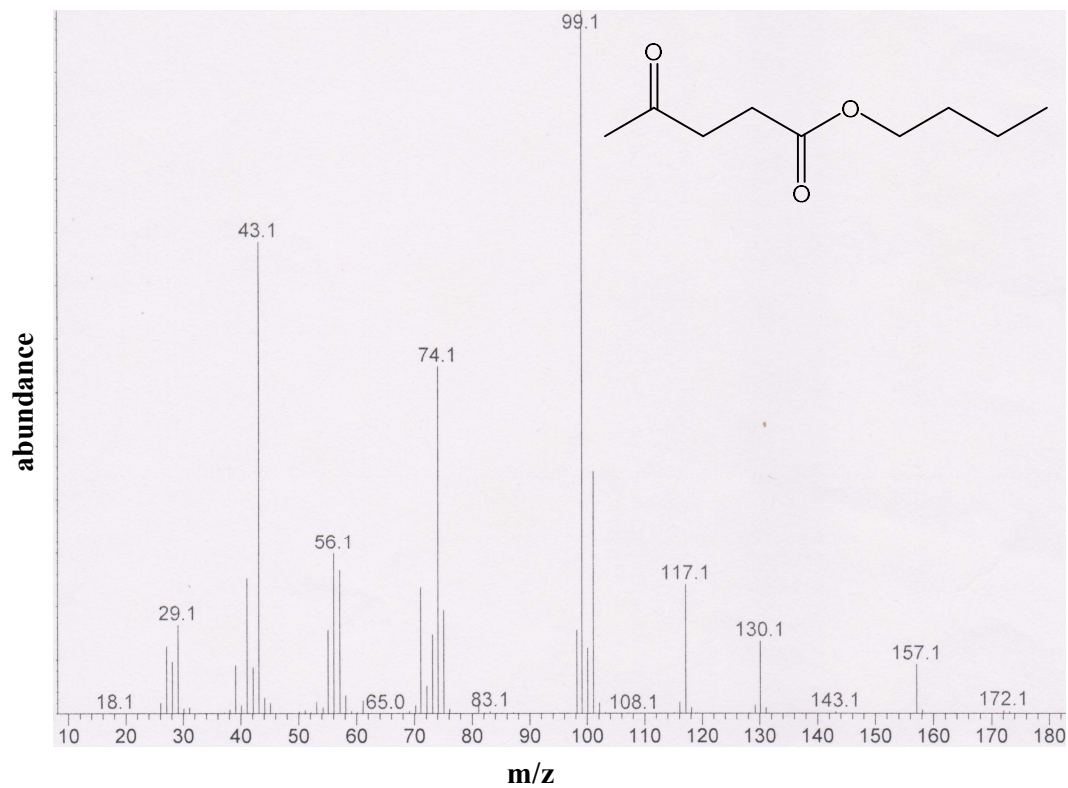

**Figure S4.** Mass spectra of butyl levulinate (BL) detected by GC-MS during FA butanolysis in presence of Aquivion P87S.

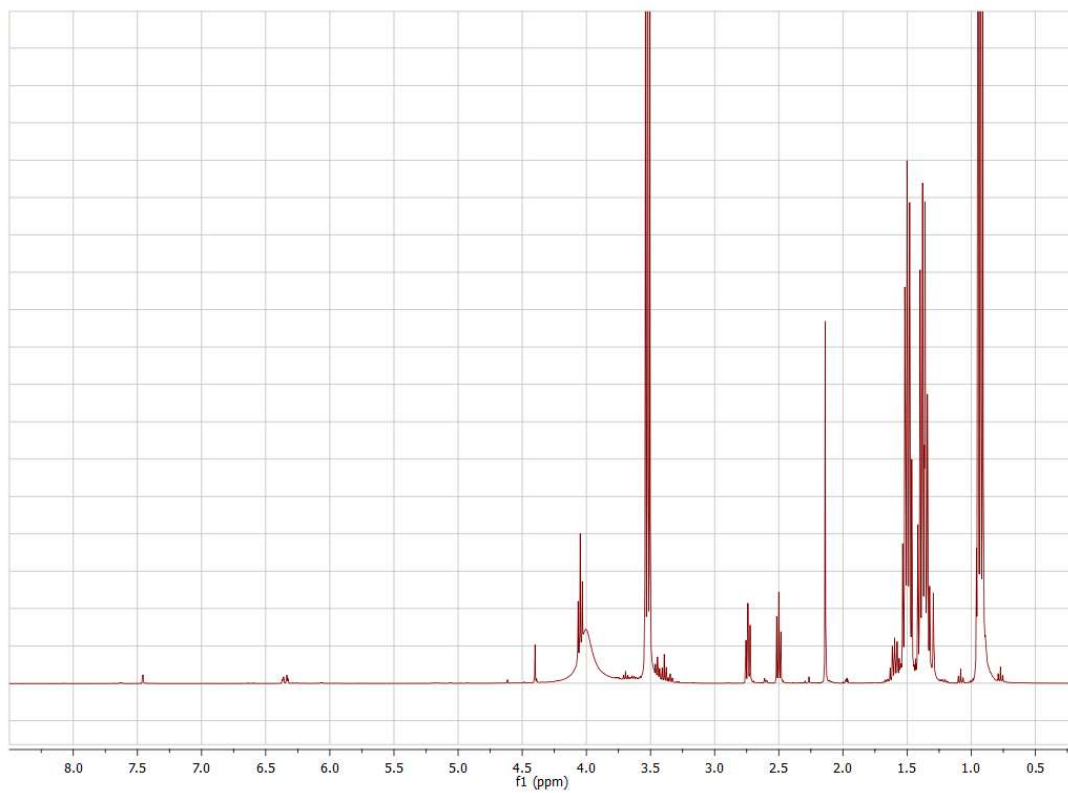

**Figure S5.** <sup>1</sup>H NMR spectrum of BL concentrated solution (13 wt.%) in CD<sub>3</sub>CN, obtained by the semibatch operating mode.

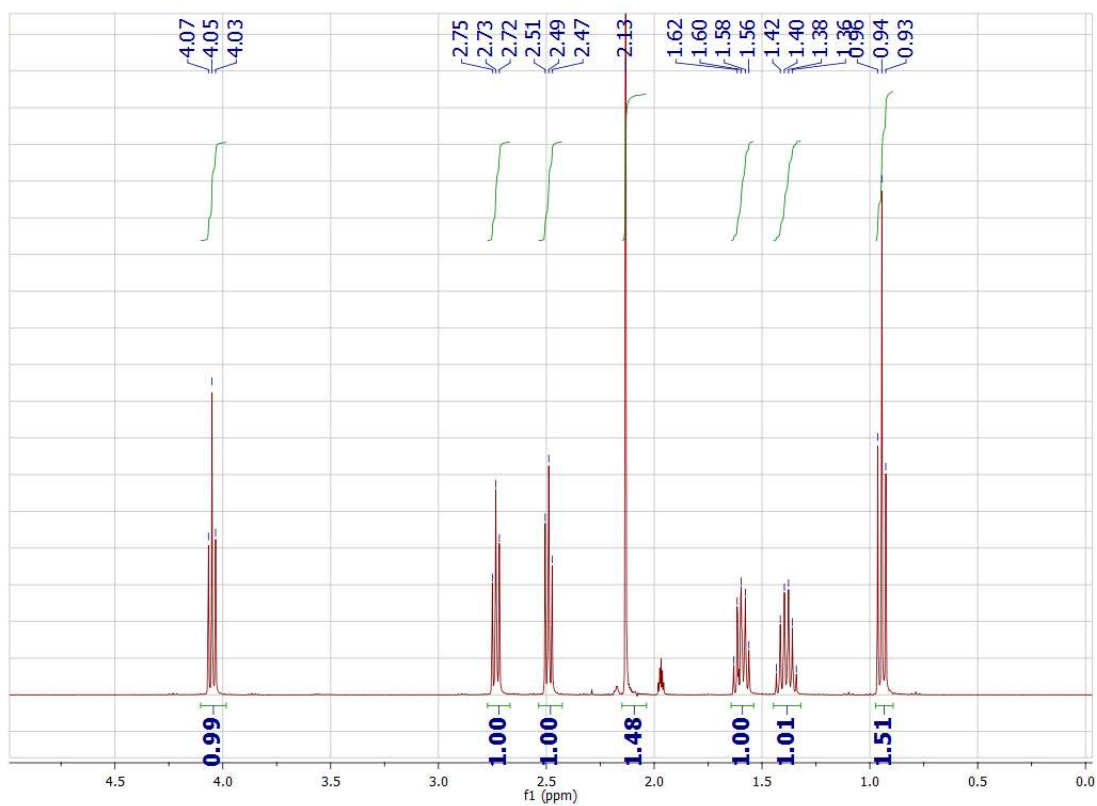

Figure S6.  $^1\text{H}$  NMR spectrum of isolated BL in  $\text{CD}_3\text{CN}$ .

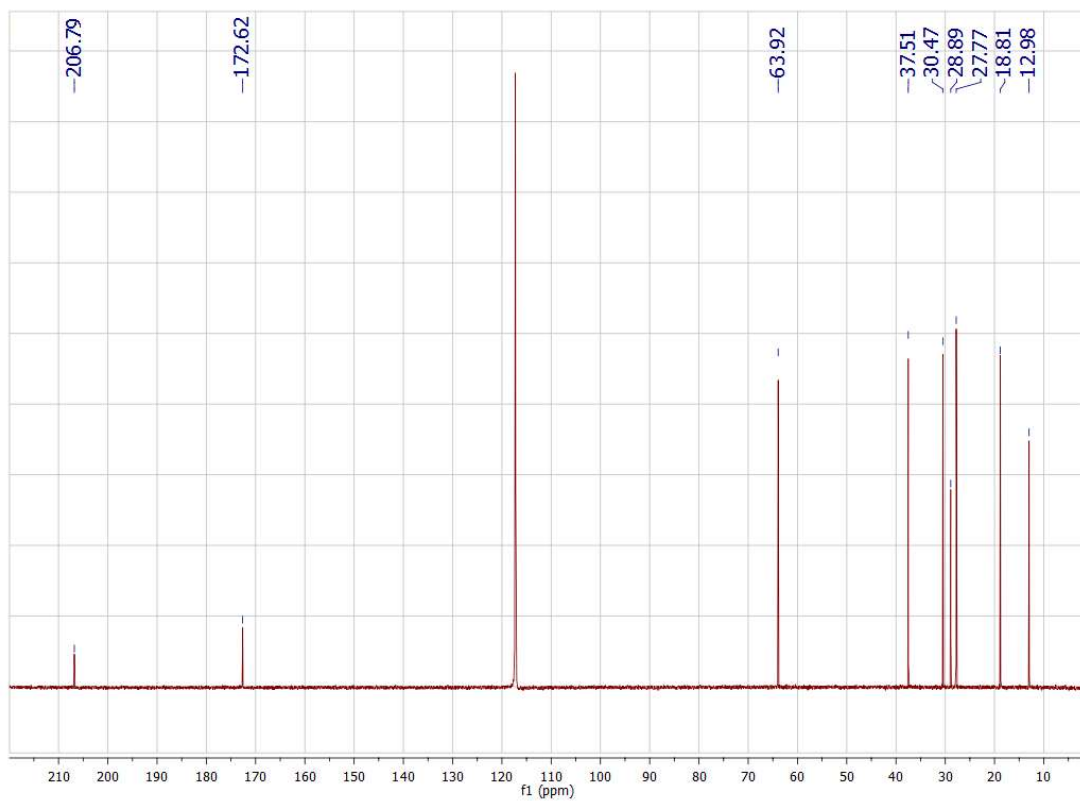

Figure S7.  $^{13}\text{C}$  NMR spectrum of isolated BL in  $\text{CD}_3\text{CN}$ .
